# Supplementary material for: Immobilisation and encapsulation of functional protein–inorganic constructs
Source: Royal Society of Chemistry journal article supplement (doi:10.1039/b903652k), 2009-04-28
Supplement: b903652k.pdf [file b903652k.pdf]

## Immobilisation and Encapsulation of Functional Protein-Inorganic Constructs

Jemma L. Vickery, Surachai Thachepan, Avinash J. Patil, and Stephen Mann

### Supplementary information

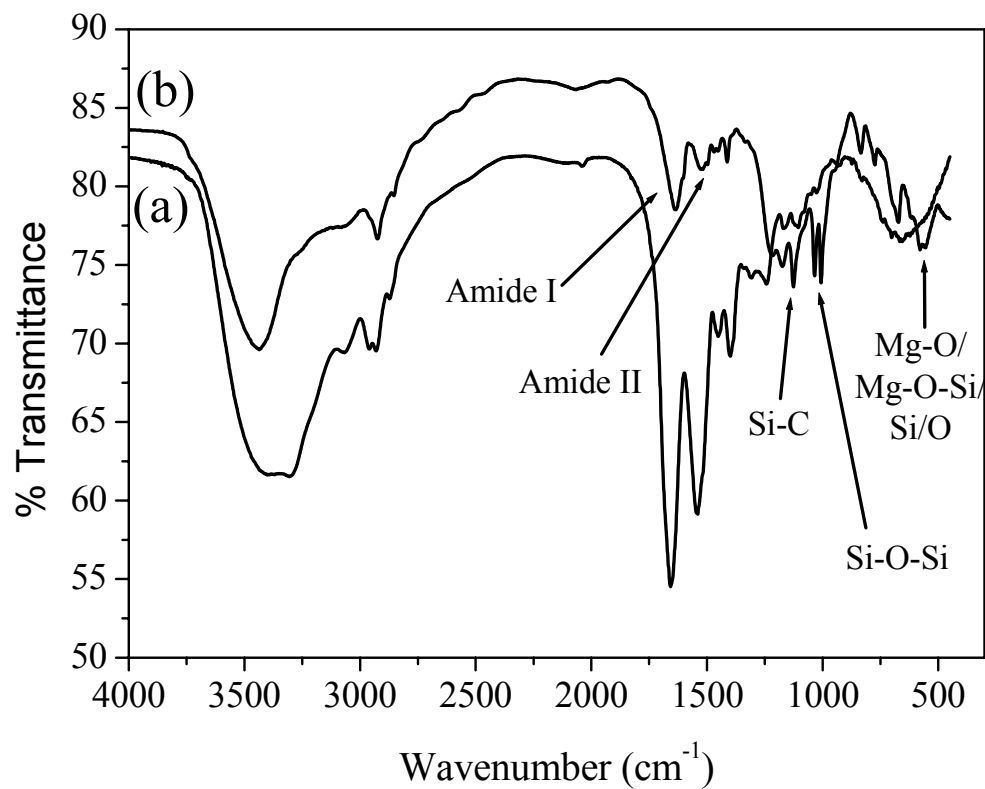

**Figure S1:** FTIR spectra of (a) native cyt *c* and (b) cyt *c*/PSS/AMP nanocomposite

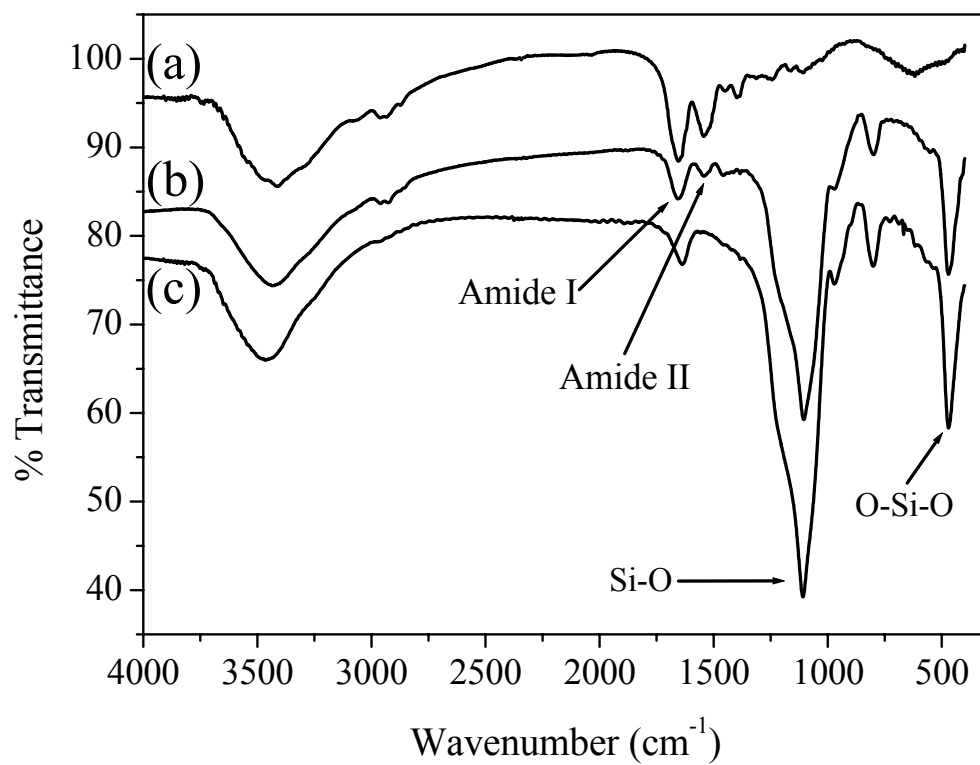

**Figure S2:** FTIR spectra of (a) native cyt *c*, (b) cyt *c*/silica hybrid nanoparticles and (c) silica nanoparticles.

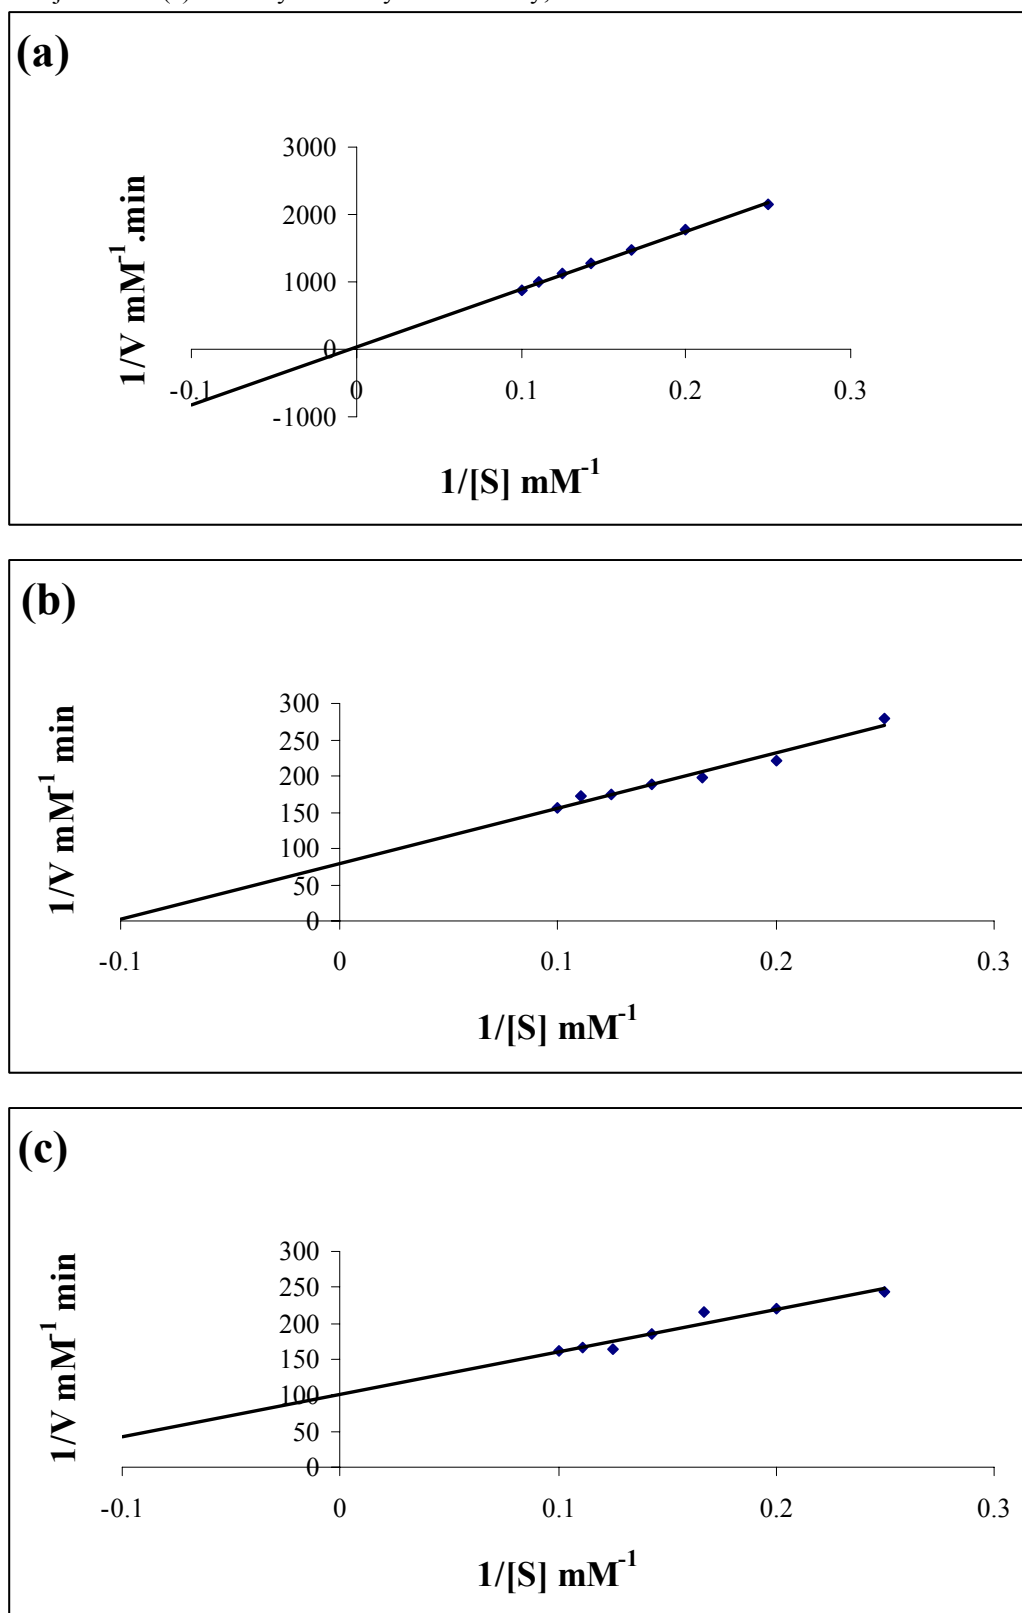

**Figure S3** Lineweaver-Burk plots of  $1/V$  versus  $1/[S]$  corresponding to the oxidation of ABTS by  $\text{H}_2\text{O}_2$  catalysed by (a) native *cyt c*, (b) *cyt c*/PSS mixture and (c) *cyt c*/PSS/AMP clay composite, respectively.

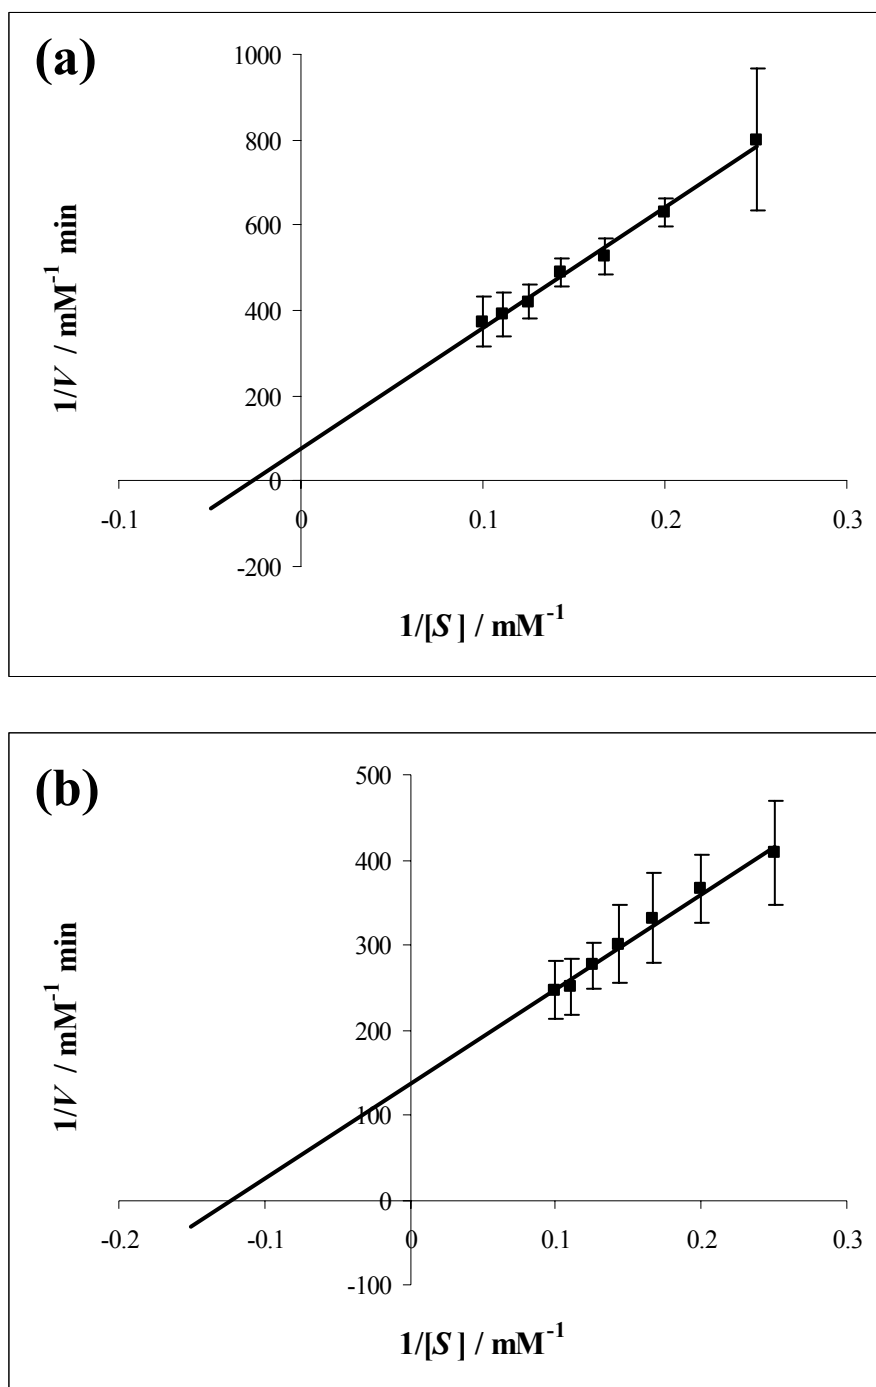

**Figure S4** Lineweaver-Burk plots of  $1/V$  versus  $1/[S]$  corresponding to the oxidation of ABTS by  $\text{H}_2\text{O}_2$  catalysed by (a) native cyt *c* and (b) cyt *c*/silica hybrid nanocomposite, respectively
